# Supplementary material for: Searching for bidirectional promoters in Arabidopsis thaliana
Source: PubMed Central journal article supplement (PMC2648788; doi:10.1186/1471-2105-10-s1-s29), 2009-01-30
Supplement: 1471-2105-10-S1-S29-S1.pdf [file 1471-2105-10-S1-S29-S1.pdf]

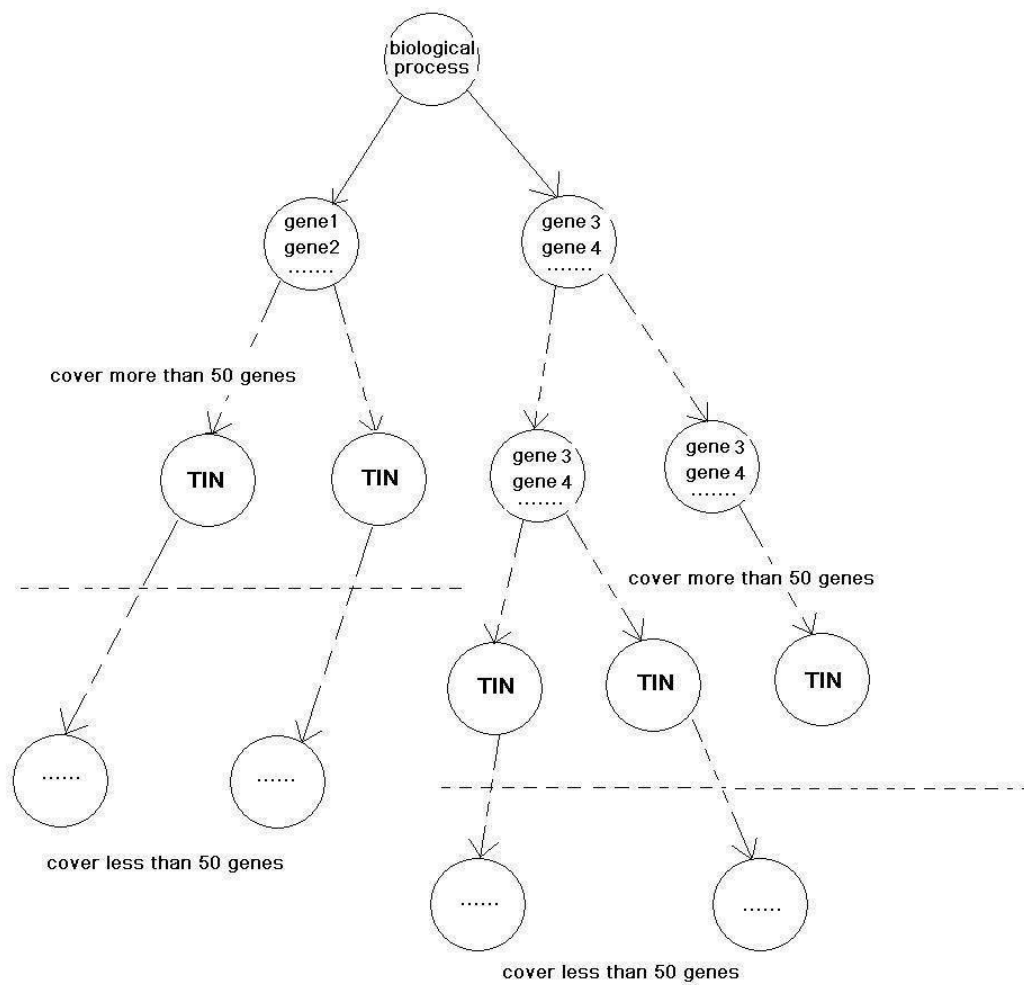

**Sketch of TIN: A Directed Acyclic Graph (DAG) structured tree (A example of “biological process”). Each node may cover several or many genes, and Terminal Informative Nodes (TINs) locate in the bottom layer covering more than 50 genes.**

---

### 31 TINs in cellular component

---

| GO term    | Function description                          |
|------------|-----------------------------------------------|
| GO:0009505 | cellulose and pectin-containing cell wall     |
| GO:0030120 | vesicle coat                                  |
| GO:0022627 | cytosolic small ribosomal subunit             |
| GO:0044432 | endoplasmic reticulum part                    |
| GO:0044431 | Golgi apparatus part                          |
| GO:0005777 | peroxisome                                    |
| GO:0005743 | mitochondrial inner membrane                  |
| GO:0044455 | mitochondrial membrane part                   |
| GO:0031969 | chloroplast membrane                          |
| GO:0009570 | chloroplast stroma                            |
| GO:0009543 | chloroplast thylakoid lumen                   |
| GO:0009535 | chloroplast thylakoid membrane                |
| GO:0010287 | plastoglobule                                 |
| GO:0015934 | large ribosomal subunit                       |
| GO:0000313 | organellar ribosome                           |
| GO:0005774 | vacuolar membrane                             |
| GO:0005635 | nuclear envelope                              |
| GO:0005732 | small nucleolar ribonucleoprotein complex     |
| GO:0005667 | transcription factor complex                  |
| GO:0009523 | photosystem II                                |
| GO:0000786 | nucleosome                                    |
| GO:0005875 | microtubule associated complex                |
| GO:0031968 | organelle outer membrane                      |
| GO:0000502 | proteasome complex                            |
| GO:0000151 | ubiquitin ligase complex                      |
| GO:0005834 | heterotrimeric G-protein complex              |
| GO:0031225 | anchored to membrane                          |
| GO:0016021 | integral to membrane                          |
| GO:0016469 | proton-transporting two-sector ATPase complex |
| GO:0008287 | protein serine/threonine phosphatase complex  |
| GO:0048046 | apoplast                                      |

---

---

## 82 TINs in molecular function

---

| GO term    | Function description                                                                         |
|------------|----------------------------------------------------------------------------------------------|
| GO:0004601 | peroxidase activity                                                                          |
| GO:0030246 | carbohydrate binding                                                                         |
| GO:0050662 | coenzyme binding                                                                             |
| GO:0005509 | calcium ion binding                                                                          |
| GO:0005507 | copper ion binding                                                                           |
| GO:0005506 | iron ion binding                                                                             |
| GO:0008270 | zinc ion binding                                                                             |
| GO:0008289 | lipid binding                                                                                |
| GO:0030533 | triplet codon-amino acid adaptor activity                                                    |
| GO:0003700 | transcription factor activity                                                                |
| GO:0003723 | RNA binding                                                                                  |
| GO:0003743 | translation initiation factor activity                                                       |
| GO:0005524 | ATP binding                                                                                  |
| GO:0005525 | GTP binding                                                                                  |
| GO:0019825 | oxygen binding                                                                               |
| GO:0005516 | calmodulin binding                                                                           |
| GO:0003779 | actin binding                                                                                |
| GO:0031072 | heat shock protein binding                                                                   |
| GO:0046983 | protein dimerization activity                                                                |
| GO:0015450 | P-P-bond-hydrolysis-driven protein<br>transmembrane transporter activity                     |
| GO:0051082 | unfolded protein binding                                                                     |
| GO:0046906 | tetrapyrrole binding                                                                         |
| GO:0008026 | ATP-dependent helicase activity                                                              |
| GO:0015662 | ATPase activity\, coupled to transmembrane movement<br>of ions\, phosphorylative mechanism   |
| GO:0019829 | cation-transporting ATPase activity                                                          |
| GO:0016811 | hydrolase activity\, acting on carbon-nitrogen<br>(but not peptide) bonds\, in linear amides |
| GO:0030599 | pectinesterase activity                                                                      |
| GO:0004620 | phospholipase activity                                                                       |

*To be continued on next page*

| <b>GO term</b> | <b>Function description</b>                                                                                                                                                                           |
|----------------|-------------------------------------------------------------------------------------------------------------------------------------------------------------------------------------------------------|
| GO:0004521     | endoribonuclease activity                                                                                                                                                                             |
| GO:0004527     | exonuclease activity                                                                                                                                                                                  |
| GO:0008081     | phosphoric diester hydrolase activity                                                                                                                                                                 |
| GO:0003993     | acid phosphatase activity                                                                                                                                                                             |
| GO:0015071     | protein phosphatase type 2C activity                                                                                                                                                                  |
| GO:0016790     | thiolester hydrolase activity                                                                                                                                                                         |
| GO:0004650     | polygalacturonase activity                                                                                                                                                                            |
| GO:0004843     | ubiquitin-specific protease activity                                                                                                                                                                  |
| GO:0004194     | pepsin A activity                                                                                                                                                                                     |
| GO:0004289     | subtilase activity                                                                                                                                                                                    |
| GO:0004185     | serine carboxypeptidase activity                                                                                                                                                                      |
| GO:0008237     | metallopeptidase activity                                                                                                                                                                             |
| GO:0003755     | peptidyl-prolyl cis-trans isomerase activity                                                                                                                                                          |
| GO:0004842     | ubiquitin-protein ligase activity                                                                                                                                                                     |
| GO:0004812     | aminoacyl-tRNA ligase activity                                                                                                                                                                        |
| GO:0016831     | carboxy-lyase activity                                                                                                                                                                                |
| GO:0016836     | hydro-lyase activity                                                                                                                                                                                  |
| GO:0030508     | thiol-disulfide exchange intermediate activity                                                                                                                                                        |
| GO:0009055     | electron carrier activity                                                                                                                                                                             |
| GO:0004497     | monooxygenase activity                                                                                                                                                                                |
| GO:0016616     | oxidoreductase activity\, acting on the CH-OH group of donors\, NAD or NADP as acceptor                                                                                                               |
| GO:0016651     | oxidoreductase activity\, acting on NADH or NADPH                                                                                                                                                     |
| GO:0016706     | oxidoreductase activity\, acting on paired donors\, with incorporation or reduction of molecular oxygen\, 2-oxoglutarate as one donor\, and incorporation of one atom each of oxygen into both donors |
| GO:0016667     | oxidoreductase activity\, acting on sulfur group of donors                                                                                                                                            |
| GO:0016620     | oxidoreductase activity\, acting on the aldehyde or oxo group of donors\, NAD or NADP as acceptor                                                                                                     |
| GO:0016627     | oxidoreductase activity\, acting on the CH-CH group of donors                                                                                                                                         |
| GO:0008080     | N-acetyltransferase activity                                                                                                                                                                          |

*To be continued on next page*

| <b>GO term</b> | <b>Function description</b>                                                              |
|----------------|------------------------------------------------------------------------------------------|
| GO:0004364     | glutathione transferase activity                                                         |
| GO:0035251     | UDP-glucosyltransferase activity                                                         |
| GO:0016763     | transferase activity\, transferring pentosyl groups                                      |
| GO:0008483     | transaminase activity                                                                    |
| GO:0008757     | S-adenosylmethionine-dependent methyltransferase activity                                |
| GO:0004702     | receptor signaling protein serine/threonine kinase activity                              |
| GO:0004712     | protein serine/threonine/tyrosine kinase activity                                        |
| GO:0003899     | DNA-directed RNA polymerase activity                                                     |
| GO:0008047     | enzyme activator activity                                                                |
| GO:0046910     | pectinesterase inhibitor activity                                                        |
| GO:0030414     | protease inhibitor activity                                                              |
| GO:0005083     | small GTPase regulator activity                                                          |
| GO:0004888     | transmembrane receptor activity                                                          |
| GO:0000156     | two-component response regulator activity                                                |
| GO:0003777     | microtubule motor activity                                                               |
| GO:0045735     | nutrient reservoir activity                                                              |
| GO:0003735     | structural constituent of ribosome                                                       |
| GO:0016563     | transcription activator activity                                                         |
| GO:0005351     | sugar\;hydrogen ion symporter activity                                                   |
| GO:0015103     | inorganic anion transmembrane transporter activity                                       |
| GO:0005261     | cation channel activity                                                                  |
| GO:0015082     | di-\, tri-valent inorganic cation transmembrane transporter activity                     |
| GO:0005451     | monovalent cation\;proton antiporter activity                                            |
| GO:0015294     | solute\;cation symporter activity                                                        |
| GO:0005244     | voltage-gated ion channel activity                                                       |
| GO:0046915     | transition metal ion transmembrane transporter activity                                  |
| GO:0015932     | nucleobase\, nucleoside\, nucleotide and nucleic acid transmembrane transporter activity |

---

## 125 TINs in biological process

---

| <b>GO term</b> | <b>Function description</b>                                                                    |
|----------------|------------------------------------------------------------------------------------------------|
| GO:0045934     | negative regulation of nucleobase\, nucleoside\, nucleotide and nucleic acid metabolic process |
| GO:0051093     | negative regulation of developmental process                                                   |
| GO:0048585     | negative regulation of response to stimulus                                                    |
| GO:0048522     | positive regulation of cellular process                                                        |
| GO:0051726     | regulation of cell cycle                                                                       |
| GO:0006355     | regulation of transcription\, DNA-dependent                                                    |
| GO:0009966     | regulation of signal transduction                                                              |
| GO:0009909     | regulation of flower development                                                               |
| GO:0035195     | miRNA-mediated gene silencing                                                                  |
| GO:0051239     | regulation of multicellular organismal process                                                 |
| GO:0031347     | regulation of defense response                                                                 |
| GO:0045454     | cell redox homeostasis                                                                         |
| GO:0030005     | cellular di-\, tri-valent inorganic cation homeostasis                                         |
| GO:0009825     | multidimensional cell growth                                                                   |
| GO:0009826     | unidimensional cell growth                                                                     |
| GO:0050790     | regulation of catalytic activity                                                               |
| GO:0031668     | cellular response to extracellular stimulus                                                    |
| GO:0007169     | transmembrane receptor protein tyrosine kinase signaling pathway                               |
| GO:0009738     | abscisic acid mediated signaling                                                               |
| GO:0009873     | ethylene mediated signaling pathway                                                            |
| GO:0007264     | small GTPase mediated signal transduction                                                      |
| GO:0007126     | meiosis                                                                                        |
| GO:0012501     | programmed cell death                                                                          |
| GO:0000904     | cellular morphogenesis during differentiation                                                  |
| GO:0051301     | cell division                                                                                  |
| GO:0006334     | nucleosome assembly                                                                            |
| GO:0043623     | cellular protein complex assembly                                                              |
| GO:0006413     | translational initiation                                                                       |
| GO:0007018     | microtubule-based movement                                                                     |
| GO:0048193     | Golgi vesicle transport                                                                        |
| GO:0006605     | protein targeting                                                                              |

---

*To be continued on next page*

| <b>GO term</b> | <b>Function description</b>                          |
|----------------|------------------------------------------------------|
| GO:0006839     | mitochondrial transport                              |
| GO:0006913     | nucleocytoplasmic transport                          |
| GO:0045045     | secretory pathway                                    |
| GO:0009832     | cellulose and pectin-containing cell wall biogenesis |
| GO:0042545     | cell wall modification                               |
| GO:0016044     | membrane organization and biogenesis                 |
| GO:0016568     | chromatin modification                               |
| GO:0030036     | actin cytoskeleton organization and biogenesis       |
| GO:0009658     | chloroplast organization and biogenesis              |
| GO:0000154     | rRNA modification                                    |
| GO:0010026     | trichome differentiation                             |
| GO:0010053     | root epidermal cell differentiation                  |
| GO:0006096     | glycolysis                                           |
| GO:0009073     | aromatic amino acid family biosynthetic process      |
| GO:0006418     | tRNA aminoacylation for protein translation          |
| GO:0009066     | aspartate family amino acid metabolic process        |
| GO:0000096     | sulfur amino acid metabolic process                  |
| GO:0006576     | biogenic amine metabolic process                     |
| GO:0009813     | flavonoid biosynthetic process                       |
| GO:0009108     | coenzyme biosynthetic process                        |
| GO:0006779     | porphyrin biosynthetic process                       |
| GO:0042446     | hormone biosynthetic process                         |
| GO:0015986     | ATP synthesis coupled proton transport               |
| GO:0006633     | fatty acid biosynthetic process                      |
| GO:0046148     | pigment biosynthetic process                         |
| GO:0006414     | translational elongation                             |
| GO:0042364     | water-soluble vitamin biosynthetic process           |
| GO:0044242     | cellular lipid catabolic process                     |
| GO:0006511     | ubiquitin-dependent protein catabolic process        |
| GO:0016114     | terpenoid biosynthetic process                       |
| GO:0008654     | phospholipid biosynthetic process                    |
| GO:0008202     | steroid metabolic process                            |
| GO:0009250     | glucan biosynthetic process                          |

*To be continued on next page*

| <b>GO term</b> | <b>Function description</b>                   |
|----------------|-----------------------------------------------|
| GO:0006486     | protein amino acid glycosylation              |
| GO:0006457     | protein folding                               |
| GO:0006468     | protein amino acid phosphorylation            |
| GO:0016567     | protein ubiquitination                        |
| GO:0006733     | oxidoreduction coenzyme metabolic process     |
| GO:0015994     | chlorophyll metabolic process                 |
| GO:0006310     | DNA recombination                             |
| GO:0006281     | DNA repair                                    |
| GO:0006261     | DNA-dependent DNA replication                 |
| GO:0006397     | mRNA processing                               |
| GO:0008380     | RNA splicing                                  |
| GO:0043414     | biopolymer methylation                        |
| GO:0016311     | dephosphorylation                             |
| GO:0033554     | cellular response to stress                   |
| GO:0007568     | aging                                         |
| GO:0048438     | floral whorl development                      |
| GO:0048437     | floral organ development                      |
| GO:0048507     | meristem development                          |
| GO:0009793     | embryonic development ending in seed dormancy |
| GO:0009553     | embryo sac development                        |
| GO:0009555     | pollen development                            |
| GO:0003002     | regionalization                               |
| GO:0009640     | photomorphogenesis                            |
| GO:0017038     | protein import                                |
| GO:0006865     | amino acid transport                          |
| GO:0008643     | carbohydrate transport                        |
| GO:0006855     | multidrug transport                           |
| GO:0009926     | auxin polar transport                         |
| GO:0006820     | anion transport                               |
| GO:0006813     | potassium ion transport                       |
| GO:0000041     | transition metal ion transport                |
| GO:0006869     | lipid transport                               |
| GO:0006857     | oligopeptide transport                        |

*To be continued on next page*



| <b>GO term</b> | <b>Function description</b>                         |
|----------------|-----------------------------------------------------|
| GO:0009814     | defense response\, incompatible interaction         |
| GO:0006118     | electron transport                                  |
| GO:0015980     | energy derivation by oxidation of organic compounds |
| GO:0019684     | photosynthesis\, light reaction                     |
| GO:0005984     | disaccharide metabolic process                      |
| GO:0009856     | pollination                                         |
| GO:0042742     | defense response to bacterium                       |
| GO:0050832     | defense response to fungus                          |
| GO:0009624     | response to nematode                                |
| GO:0019953     | sexual reproduction                                 |
| GO:0009651     | response to salt stress                             |
| GO:0009642     | response to light intensity                         |
| GO:0009411     | response to UV                                      |
| GO:0009409     | response to cold                                    |
| GO:0009408     | response to heat                                    |
| GO:0009414     | response to water deprivation                       |
| GO:0009733     | response to auxin stimulus                          |
| GO:0009735     | response to cytokinin stimulus                      |
| GO:0009739     | response to gibberellin stimulus                    |
| GO:0010038     | response to metal ion                               |
| GO:0009753     | response to jasmonic acid stimulus                  |
| GO:0009743     | response to carbohydrate stimulus                   |
| GO:0006979     | response to oxidative stress                        |
| GO:0009751     | response to salicylic acid stimulus                 |
| GO:0009636     | response to toxin                                   |
| GO:0042594     | response to starvation                              |
| GO:0009611     | response to wounding                                |
| GO:0007623     | circadian rhythm                                    |
