# Supplementary material for: Searching for bidirectional promoters in Arabidopsis thaliana
Source: PubMed Central journal article supplement (PMC2648788; doi:10.1186/1471-2105-10-s1-s29), 2009-01-30
Supplement: 1471-2105-10-S1-S29-S2.pdf [file 1471-2105-10-S1-S29-S2.pdf]

**Pairs with common orthologs**

| <b>Pair_ID</b> | <b>Gene pairs</b>      | <b>Species</b>                   | <b>Orthologs</b>                       |
|----------------|------------------------|----------------------------------|----------------------------------------|
| 2              | AT3G51560<br>AT3G51570 | <i>Caenorhabditis remanei</i>    | cr01.sctg700.wum.2.1 (WBGene00073322)  |
|                |                        |                                  | cr01.sctg84.wum.23.1 (WBGene00066813)  |
|                |                        |                                  | cr01.sctg84.wum.25.1 (WBGene00066815)  |
|                |                        |                                  | cr01.sctg84.wum.21.1 (WBGene00066811)  |
|                |                        |                                  | cr01.sctg2713.wum.1.1 (WBGene00075677) |
|                |                        |                                  | cr01.sctg84.wum.27.1 (WBGene00066817)  |
|                |                        |                                  | cr01.sctg84.wum.31.1 (WBGene00066821)  |
|                |                        |                                  | cr01.sctg3429.wum.1.1 (WBGene00076040) |
|                |                        |                                  | cr01.sctg3279.wum.1.1 (WBGene00075974) |
| 4              | AT4G36140<br>AT4G36150 | <i>Caenorhabditis remanei</i>    | cr01.sctg700.wum.2.1 (WBGene00073322)  |
|                |                        |                                  | cr01.sctg84.wum.23.1 (WBGene00066813)  |
|                |                        |                                  | cr01.sctg84.wum.25.1 (WBGene00066815)  |
|                |                        |                                  | cr01.sctg84.wum.21.1 (WBGene00066811)  |
|                |                        |                                  | cr01.sctg2713.wum.1.1 (WBGene00075677) |
|                |                        |                                  | cr01.sctg84.wum.27.1 (WBGene00066817)  |
|                |                        |                                  | cr01.sctg84.wum.31.1 (WBGene00066821)  |
|                |                        |                                  | cr01.sctg3429.wum.1.1 (WBGene00076040) |
|                |                        |                                  | cr01.sctg3279.wum.1.1 (WBGene00075974) |
| 6              | AT2G23070<br>AT2G23080 | <i>Caenorhabditis briggsae</i>   | BP:CBP03097(WBGene00033711)            |
|                |                        | <i>Caenorhabditis elegans</i>    | WBGene00002191                         |
|                |                        | <i>Caenorhabditis remanei</i>    | Cre-kin-3 (WBGene00056231)             |
|                |                        | <i>Candida glabrata</i>          | XP_447476                              |
|                |                        | <i>Cryptococcus neoformans</i>   | XP_571600                              |
|                |                        | <i>Debaryomyces hansenii</i>     | XP_456923                              |
|                |                        | <i>Schizosaccharomyces pombe</i> | SPAC23C11.11                           |
|                |                        | <i>Yarrowia lipolytica</i>       | XP_502914                              |
| 7              | AT1G07550<br>AT1G07560 | <i>Caenorhabditis briggsae</i>   | BP:CBP20987 (WBGene00024957)           |
|                |                        | <i>Caenorhabditis remanei</i>    | cr01.sctg1121.wum.3.1 (WBGene00074176) |
|                |                        |                                  | cr01.sctg33.wum.115.1 (WBGene00062774) |
| 26             | AT5G01680<br>AT5G01690 | <i>Caenorhabditis remanei</i>    | cr01.sctg700.wum.2.1 (WBGene00073322)  |
|                |                        |                                  | cr01.sctg84.wum.23.1 (WBGene00066813)  |
|                |                        |                                  | cr01.sctg84.wum.25.1 (WBGene00066815)  |
|                |                        |                                  | cr01.sctg84.wum.21.1 (WBGene00066811)  |
|                |                        |                                  | cr01.sctg2713.wum.1.1 (WBGene00075677) |
|                |                        |                                  | cr01.sctg84.wum.27.1 (WBGene00066817)  |
|                |                        |                                  | cr01.sctg84.wum.31.1 (WBGene00066821)  |
|                |                        |                                  | cr01.sctg3429.wum.1.1 (WBGene00076040) |
|                |                        |                                  | cr01.sctg3279.wum.1.1 (WBGene00075974) |
